# Supplementary material for: Inhibition of the NOTCH1 Pathway in the Stressed Heart Limits Fibrosis and Promotes Recruitment of Non-Myocyte Cells into the Cardiomyocyte Fate
Source: MDPI journal article supplement (doi:10.3390/jcdd9040111), 2022-04-07
Supplement: s1 [file s1]

# **Inhibition of the NOTCH1 pathway in the stressed heart limits fibrosis and promotes recruitment of non-myocyte cells into the cardiomyocyte fate**

**Mohamed Nemir, Maryam Kay, Damien Maison, Corinne Berthonneche, Alexandre Sarre, Isabelle Plaisance, Thierry Pedrazzini**

## **Online Supplementary Material**

### List of Supplementary Tables and Figures

- Suppl. Table S1 List of primers, GapmeRs, TaqMan probes and antibodies.
- Suppl. Table S2 Echographic parameters in TAC mice administered with either anti-NRR1 or anti NRR2 antibodies.
- Suppl. Table S3 Echographic parameters in TAC mice administered with anti-Wisper GapmeRs.
- Suppl. Figure S1 The NOTCH pathway is activated in non-myocyte cells under pressure overload.
- Suppl. Figure S2 Upregulation of NOTCH receptor expression in anti-NRR2 treated mice.
- Suppl. Figure S3 Anti-NRR1 treatment blocks NOTCH1 signaling in the heart.
- Suppl. Figure S4 Conversion from tdT- to EGFP-expressing cardiomyocytes in MerCreMer; ROSA26-mTmG double transgenic mice upon tamoxifen administration.
- Suppl. Figure S5 Wisper knockdown is associated with downregulation of the NOTCH pathway in the heart.

Supplementary Table S1: List of primers, GapmeRs, TaqMan probes and antibodies.

| Target                     | Sequence/ Assay       | Source              |
|----------------------------|-----------------------|---------------------|
| <i>Wisper</i> Left Primer  | CTGCTTCTCCAAAAGCCAAG  | microsynth.ch       |
| <i>Wisper</i> Right Primer | TAGACGAGCTGCTTCCCACT  | microsynth.ch       |
| <i>Gapdh</i> Left Primer   | TGCACCACCAACTGCTTAGC  | microsynth.ch       |
| <i>Gapdh</i> Right Primer  | GGCATGGACTGTGGTCATGAG | microsynth.ch       |
| Control GapmeR             | AGGTGTGCGATAGAG       | Exiqon (qiagen.com) |
| <i>Wisper</i> GapmeR       | AACACGTCTATACGC       | Exiqon (qiagen.com) |

|               |               |                    |
|---------------|---------------|--------------------|
| <i>Myh6</i>   | Mm00440354_m1 | Applied Biosystems |
| <i>Myh7</i>   | Mm00600555_m1 | Applied Biosystems |
| <i>Nppa</i>   | Mm01255747_g1 | Applied Biosystems |
| <i>Nppb</i>   | Mm01255770_g1 | Applied Biosystems |
| <i>Acta1</i>  | Mm00808218_g1 | Applied Biosystems |
| <i>Ctgf</i>   | Mm01192933_g1 | Applied Biosystems |
| <i>TGFb2</i>  | Mm00436955_m1 | Applied Biosystems |
| <i>Col1a1</i> | Mm00801666_g1 | Applied Biosystems |
| <i>Col3a1</i> | Mm00802331_m1 | Applied Biosystems |
| <i>Postn</i>  | Mm00450111_m1 | Applied Biosystems |
| <i>Notch1</i> | Mm00435245_m1 | Applied Biosystems |
| <i>Notch2</i> | Mm00803077_m1 | Applied Biosystems |
| <i>Notch3</i> | Mm00435270_m1 | Applied Biosystems |
| <i>Notch4</i> | Mm00440525_m1 | Applied Biosystems |
| <i>Dll1</i>   | Mm00432841_m1 | Applied Biosystems |
| <i>Dll3</i>   | Mm00432854_m1 | Applied Biosystems |
| <i>Dll4</i>   | Mm00444619_m1 | Applied Biosystems |
| <i>Jag1</i>   | Mm00496902_m1 | Applied Biosystems |
| <i>Jag2</i>   | Mm00439935_m1 | Applied Biosystems |
| <i>Hes1</i>   | Mm00468601_m1 | Applied Biosystems |
| <i>Hes5</i>   | Mm00439311_g1 | Applied Biosystems |
| <i>Hey1</i>   | Mm00468865_m1 | Applied Biosystems |
| <i>Hey2</i>   | Mm00469280_m1 | Applied Biosystems |

| Antibody                | Source and Cat. #                        | RRID       | Dilution |
|-------------------------|------------------------------------------|------------|----------|
| Mouse anti-a-actinin    | Sigma-Aldrich Cat# A7811                 | AB_476766  | 1:500    |
| Mouse anti-a-actinin    | Alexa-Fluor 647 / 488-conjugated         | in house   | 1:250    |
| Rabbit anti-laminin     | Sigma-Aldrich Cat# L9393                 | AB_477163  | 1:500    |
| Rabbit anti-laminin     | Alexa-Fluor 647 / 488-conjugated         | in house   | 1:250    |
| Rabbit anti-GATA4       | Abcam Cat# ab134057                      | AB_2725747 | 1:250    |
| Rat anti-BrdU           | Abcam Cat# ab6326                        | AB_305426  | 1:400    |
| Rat anti-Sca-1          | Abcam Cat# ab51317                       | AB_1640946 | 1:1000   |
| Rabbit anti-Periostin   | Abcam Cat# ab14041                       | AB_2299859 | 1:500    |
| Rabbit anti-N-Cadherin  | Abcam Cat# ab12221                       | AB_298943  | 1:100    |
| Rabbit anti-PDGFRa      | Abcam Cat# ab61219                       | AB_2162341 | 1:100    |
| Rabbit anti-Connexin-43 | Sigma-Aldrich Cat# C6219                 | AB_476857  | 1:500    |
| Goat anti-vimentin      | Sigma-Aldrich Cat# V4630                 | AB_477619  | 1:150    |
| Rat anti-CD31           | Thermo Fisher Scientific Cat# 14-0311-82 | AB_467201  | 1:300    |
| Chicken anti-EGFP       | Abcam Cat# ab13970                       | AB_300798  | 1:1000   |

Supplementary Table S2: Echographic parameters in TAC mice administered with either anti-NRR1 or anti NRR2 antibodies.

| Group           | BW<br>(g)  | LVM<br>(mg)     | LVM/BW<br>(mg/g) | LVID;d<br>(mm) | LVID;s<br>(mm) | LVPW;d<br>(mm) | LVPW;s<br>(mm) | %EF         | AoV<br>(mm/s)     | n = |
|-----------------|------------|-----------------|------------------|----------------|----------------|----------------|----------------|-------------|-------------------|-----|
| WT-Sham-None    | 44.7 ± 1.4 | 136.5 ± 6.3     | 3.1 ± 0.1        | 4.1 ± 0.1      | 2.5 ± 0.1      | 0.9 ± 0        | 1.3 ± 0.1      | 69.9 ± 1.9  | 962.5 ± 57.2      | 7   |
| WT-TAC-None     | 43.8 ± 1.4 | 232.5 ± 19.4 *  | 5.3 ± 0.5 *      | 4.2 ± 0.2      | 3.1 ± 0.2 *    | 1.2 ± 0 *      | 1.5 ± 0 *      | 54.3 ± 4.6* | 3267.4 ± 224.1 *  | 8   |
| TgJ1-Sham-None  | 36.3 ± 2.5 | 83.7 ± 7.1 †    | 2.3 ± 0.2 ‡      | 3.4 ± 0.2 ‡    | 2.1 ± 0.2‡     | 0.8 ± 0 ‡      | 1.1 ± 0 ‡      | 68 ± 2.7    | 732.2 ± 39.3      | 7   |
| TgJ1-TAC-None   | 39.8 ± 2.4 | 152.9 ± 20.7 *‡ | 3.8 ± 0.4*‡      | 3.7 ± 0.2 ‡    | 2.5 ± 0.3      | 1 ± 0.1 *‡     | 1.4 ± 0.1 *    | 62.1 ± 5.6  | 3259.3 ± 269.5 *  | 7   |
| WT-Sham-αNRR1   | 45 ± 1.8   | 122.7 ± 9.2     | 2.7 ± 0.2        | 3.9 ± 0.1 †    | 2.5 ± 0.1      | 0.9 ± 0        | 1.2 ± 0.1      | 65.8 ± 1.9  | 837 ± 77.2        | 6   |
| WT-TAC-αNRR1    | 41.4 ± 1.7 | 180.5 ± 13.2 *† | 4.3 ± 0.2*†      | 4 ± 0.1        | 2.6 ± 0.2      | 1.1 ± 0.1*†    | 1.5 ± 0.1 *    | 63.8 ± 3.8  | 4112.9 ± 213.5 *† | 9   |
| TgJ1-Sham-αNRR1 | 38 ± 1.2   | 78.3 ± 7.9 †    | 2.1 ± 0.2        | 3.1 ± 0.2 ‡    | 1.8 ± 0.1‡     | 0.8 ± 0 ‡      | 1.1 ± 0.1 ‡    | 75.6 ± 2.9† | 753.4 ± 33.6      | 7   |
| TgJ1-TAC-αNRR1  | 39.4 ± 1.3 | 109.2 ± 13.1*†‡ | 2.8 ± 0.4*‡      | 3.1 ± 0.2 ‡    | 1.8 ± 0.2 †    | 1 ± 0 *†‡      | 1.4 ± 0.1 *    | 76.1 ± 4 †‡ | 4069.4 ± 289.4 *† | 7   |
| WT-Sham-αNRR2   | 39.8 ± 7.1 | 99.1 ± 13.8 †   | 2.6 ± 0.3        | 4.2 ± 0.2      | 2.8 ± 0.3      | 0.7 ± 0.1 †    | 1.1 ± 0.1 †    | 61.8 ± 6.3  | 972 ± 84.1        | 5   |
| WT-TAC-αNRR2    | 44.8 ± 2.2 | 219.5 ± 14.9 *  | 5 ± 0.4 *        | 4.8 ± 0.2*†    | 3.6 ± 0.2 *    | 1.1 ± 0 *†     | 1.4 ± 0.1 *    | 51.4 ± 4 *  | 3492.1 ± 241.9 *  | 9   |
| TgJ1-Sham-αNRR2 | 38 ± 2.1   | 87.4 ± 9.4      | 2.3 ± 0.2        | 3.8 ± 0.2      | 2.4 ± 0.2‡     | 0.8 ± 0.1      | 1.4 ± 0.1 †‡   | 69.5 ± 2.3  | 1103.1 ± 144.6 †  | 5   |
| TgJ1-TAC-αNRR2  | 44.8 ± 1.4 | 149 ± 11.7 *‡   | 3.4 ± 0.3*‡      | 3.9 ± 0.2 ‡    | 2.6 ± 0.2      | 1.1 ± 0.1 *    | 1.5 ± 0.1      | 65.5 ± 4.4‡ | 3306.1 ± 162.9 *  | 10  |

WT and TgJ1 mice were subjected to aortic constriction (TAC) or to Sham operation (Sham), as in Figure 1A. Two weeks later, the mice received either no antibody (None), NOTCH1 (αNRR1) or NOTCH2 (αNRR2) blocking antibodies. Echocardiography measurements were performed 4 weeks post-surgery. Abbreviations are: BW, body weight; LVM, LV mass; LVM/BW, LV mass-to-body weight ratio; LVID;d, left ventricle internal diameter in diastole;-s, in systole; LVPW;d, left ventricle posterior wall in diastole; -s, in systole; %EF, percent ejection fraction; AoV, aortic velocity. The values represent mean ± SEM. \*, p<0.05 in TAC vs. Sham; †, in NRR1/2 vs. None; ‡, in TgJ1 vs. WT. The number of animals per group is indicated in the right-most column (n =).

Supplementary Table S3: Echographic parameters in TAC mice administered with anti-Wisper GapmeRs.

| Group               | BW<br>(g)     | LVM<br>(mg)       | LVM/BW<br>(mg/g) | LVID;d<br>(mm) | LVID;s<br>(mm) | LVPW;d<br>(mm)  | LVPW;s<br>(mm) | %EF             | AoV<br>(mm/s)       | n = |
|---------------------|---------------|-------------------|------------------|----------------|----------------|-----------------|----------------|-----------------|---------------------|-----|
| Sham Control-GapmeR | 27.8 ±<br>0.7 | 85.6 ±<br>4.2     | 3.1 ±<br>0.2     | 3.5 ±<br>0.1   | 2.3 ±<br>0.1   | 0.8 ±<br>0      | 1.0 ±<br>0     | 63.3 ±<br>3.6   | 817.2 ±<br>39.6     | 6   |
| TAC Control-GapmeR  | 27.7 ±<br>0.2 | 200.1 ±<br>17.3 * | 7.2 ±<br>0.7 *   | 4.0 ±<br>0.2 * | 3.3 ±<br>0.2 * | 1.2 ±<br>0.0 *  | 1.4 ±<br>0.0 * | 38.0 ±<br>2.7 * | 4783.0 ±<br>52.6 *  | 9   |
| Sham Wisper-GapmeR  | 26.4 ±<br>0.5 | 87.4 ±<br>3.9     | 3.3 ±<br>0.2     | 3.6 ±<br>0.1   | 2.3 ±<br>0.1   | 0.7 ±<br>0      | 1.0 ±<br>0     | 64.2 ±<br>3.8   | 892.9 ±<br>42.5     | 5   |
| TAC Wisper-GapmeR   | 25.9 ±<br>0.5 | 123.0 ±<br>4.8 *† | 4.8 ±<br>0.2 *†  | 3.5 ±<br>0.1†  | 2.5 ±<br>0.1†  | 1.0 ±<br>0.0 *† | 1.3 ±<br>0.0 * | 56.6 ±<br>3.2†  | 4512.5 ±<br>201.7 * | 10  |

Mice were subjected to aortic constriction (TAC) or to Sham operation (Sham), as in Figure 6A. Two weeks later, the mice received weekly injections of either Control-GapmeR or Wisper-GapmeR, for 4 consecutive weeks. The table presents echocardiography measurements performed at 6 weeks post-surgery. Abbreviations are: BW, body weight; LVM, LV mass; LVM/BW, LV mass-to-body weight ratio; LVID;d, left ventricle internal diameter in diastole;-s, in systole; LVPW;d, left ventricle posterior wall in diastole; -s, in systole; %EF, percent ejection fraction; AoV, aortic velocity. The values represent mean ± SEM. \*, p<0.05 in TAC vs. Sham; †, Wisper-GapmeR vs. Control-GapmeR. The number of animals per group is indicated in the right-most column (n=).

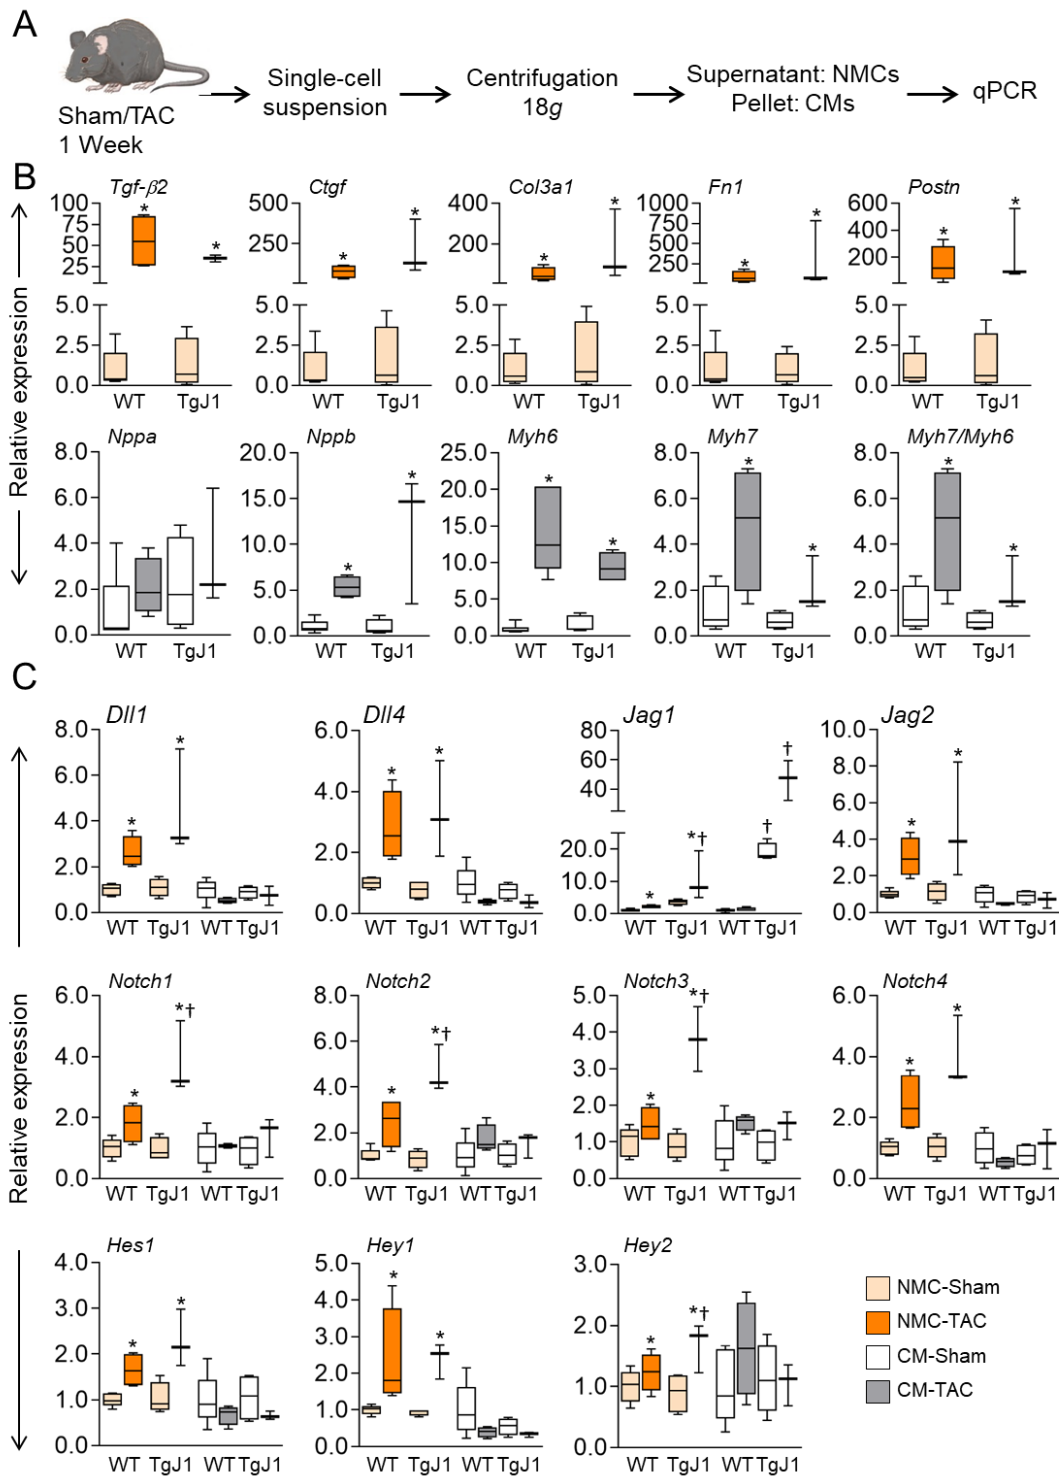

Supplementary Figure S1. The NOTCH pathway is activated in non-myocyte cells under pressure overload. (A). WT and TgJ1 mice were subjected to Sham or TAC surgery. After 1 week, the hearts were harvested and the non-myocyte (NMCs) cells and cardiomyocytes (CMs) were isolated by enzymatic digestion and differential centrifugation and processed for total cellular RNA isolation and quantitative RT-PCR analyses. (B). Expression level of fibrosis marker genes (*Tgf-2*, *Ctgf*, *Col3a1*, *Fn1* and *Postn*), and cardiomyocyte stress genes (*Nppa*, *Nppb*, *Myh6*, *Myh7* and *Myh7/Myh6* ratio). (C) Expression level of NOTCH receptors (*Notch1-Notch4*), ligands (*Dll1*, *Dll4*, *Jag1* and *Jag2*) and target genes (*Hes1*, *Hey1* and *Hey2*). The expression levels are relative to Sham-operated WT mice (WT Sham, n = 5; WT TAC, n = 4; TgJ1 Sham, n = 4; TgJ1 TAC, n = 3). \*, p<0.05 in TAC vs. Sham; †, p<0.05 in TgJ1 vs. WT.

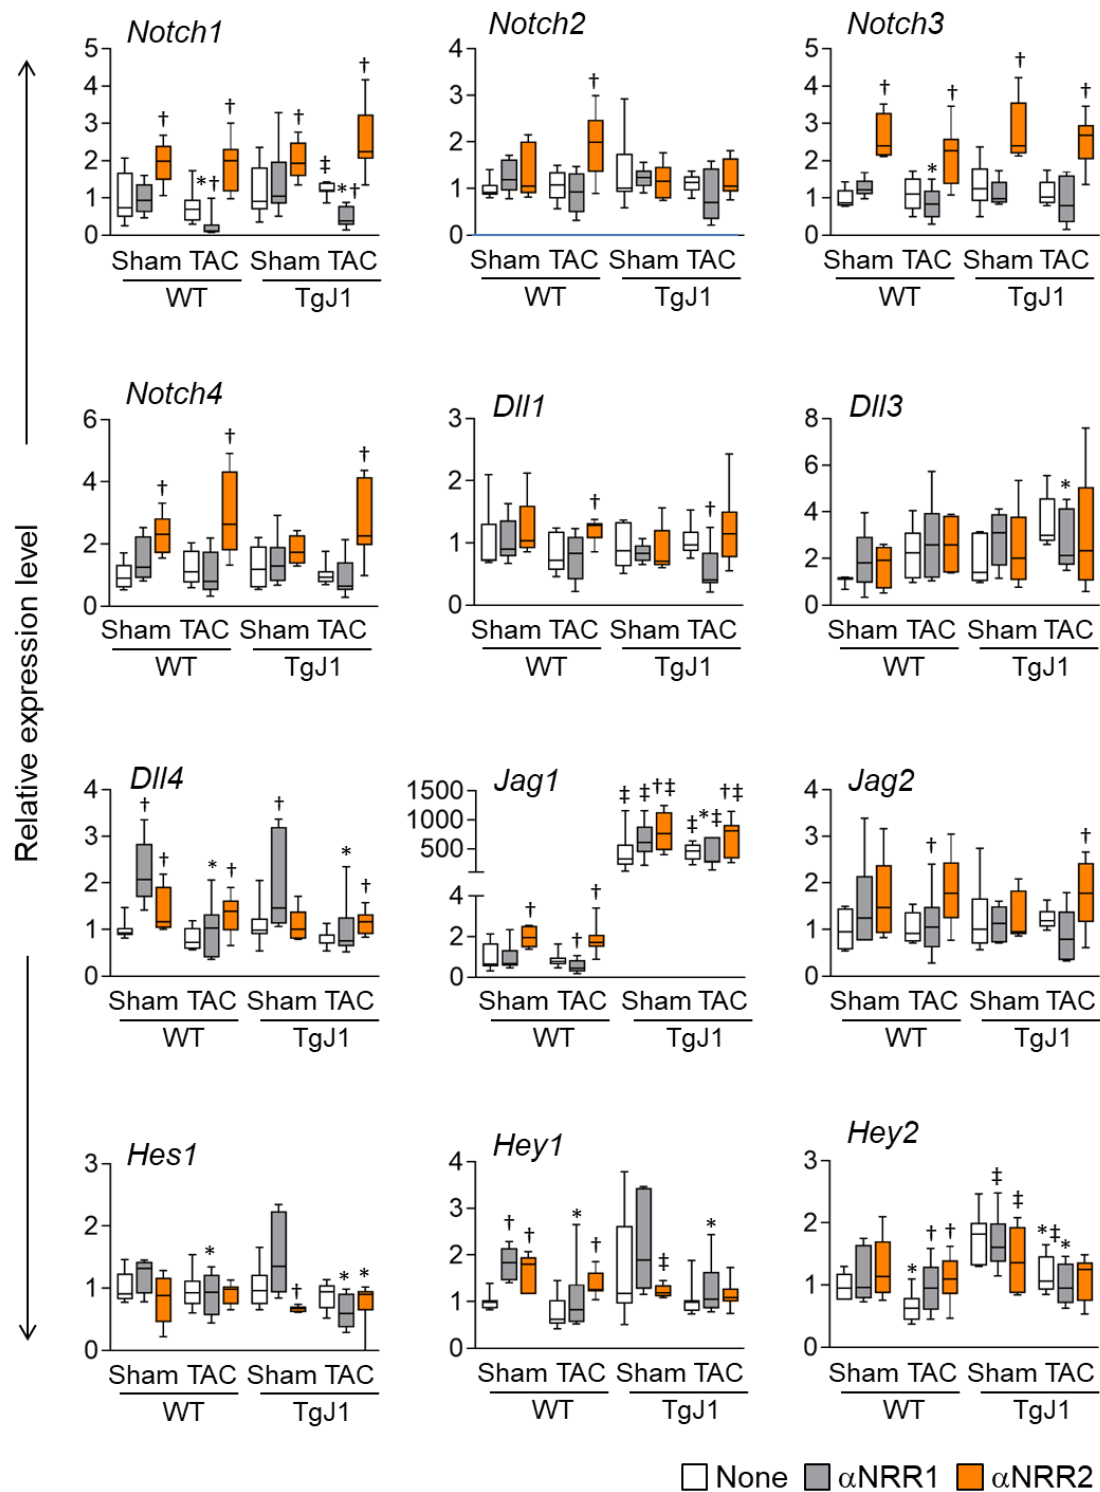

Supplementary Figure S2. Upregulation of NOTCH receptor expression in anti-NRR2 treated mice. WT and TgJ1 mice were subjected to TAC or Sham operation, as in Figure 1A. After 2 weeks, they were injected with  $\alpha$ NRR1 or  $\alpha$ NRR2. At 4 weeks post-surgery, the hearts were harvested and subjected to quantitative RT-PCR analysis of gene expression of NOTCH receptors (Notch1-Notch4), ligands (DII1, DII2, DII4, Jag1 and Jag2) and target genes (Hes1, Hey1 and Hey2). The levels of expression are relative to Sham-operated, untreated WT mice. The number of mice per group is indicated in Supplementary Table 1. \*,  $p < 0.05$  in TAC vs. Sham; †,  $p < 0.05$  in NRR vs. None; ‡,  $p < 0.05$  in TgJ1 vs. WT.

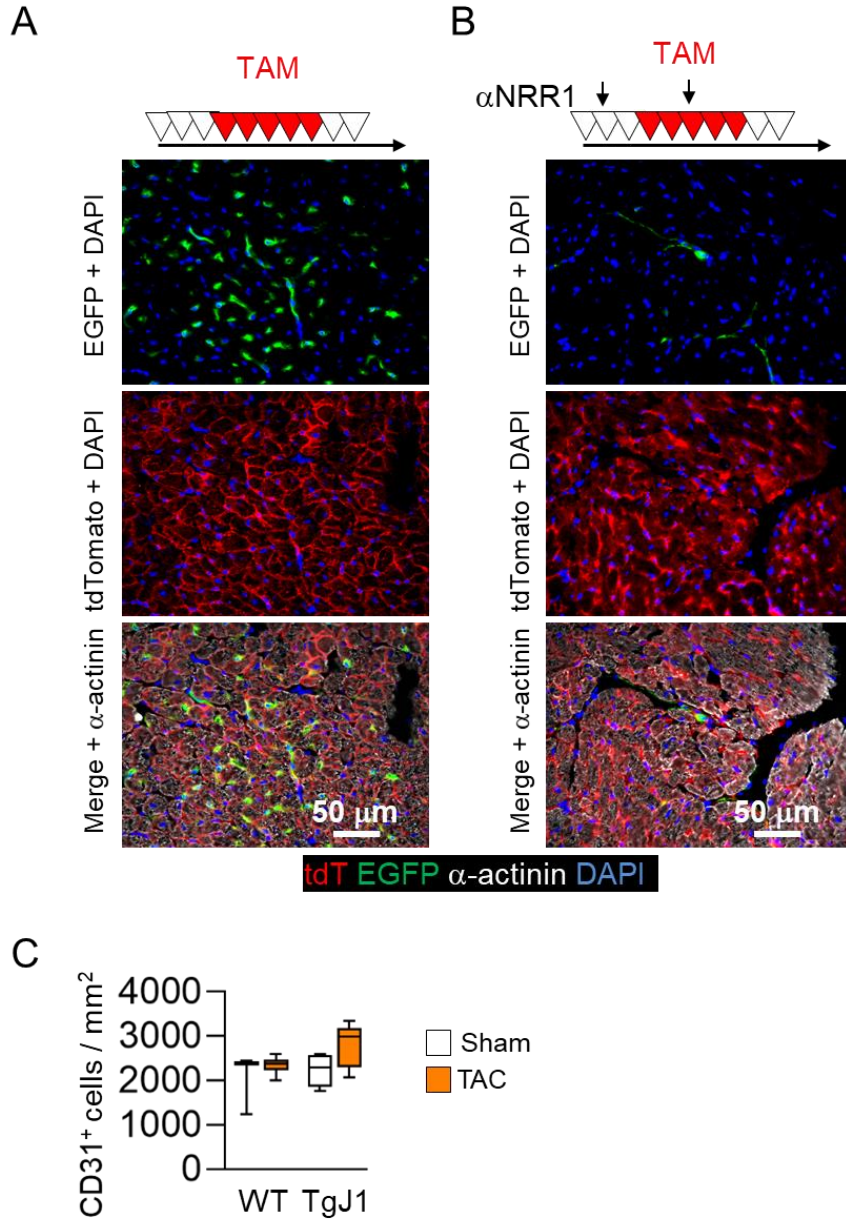

Supplementary Figure S3. Anti-NRR1 treatment blocks NOTCH1 signaling in the heart. (A) N1IP-CreErt2;ROSA26-mTmG NOTCH1 reporter mice were injected with Tamoxifen to induce conversion from tdT to EGFP expression in cells experiencing NOTCH1 signaling. (B) Mice were injected with anti-NRR1 antibody to block NOTCH1 signaling prior to and during Tamoxifen administration. Two days after the last Tamoxifen injection, the hearts were harvested and processed for immunostaining to reveal NOTCH1-traced EGFP-positive cells (Green), tdT-positive non-traced cells (Red) and  $\alpha$ -actinin (Gray). Note the reduced number of EGFP+ cells in presence of anti-NRR1 injection. Scale bar = 50  $\mu$ m. (C). Capillary density (CD31<sup>+</sup> cells / mm<sup>2</sup>) in WT and TgJ1 mice subjected to Sham and TAC surgery and  $\alpha$ NRR1 treatment, as described in Figure 4.



A

*Myh6-merCremer; Rosa26mTmG*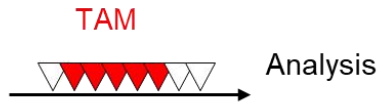

B

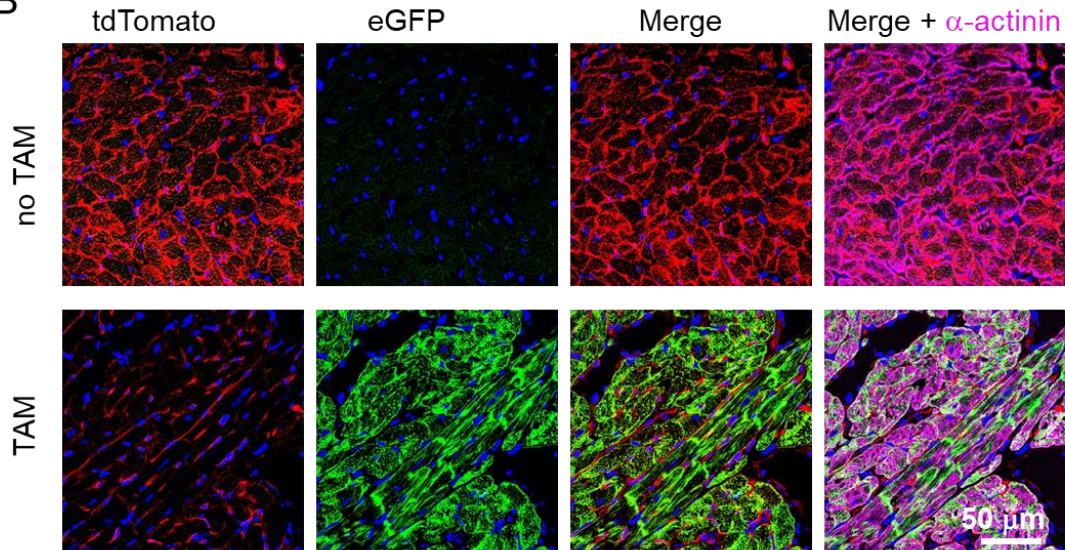

C

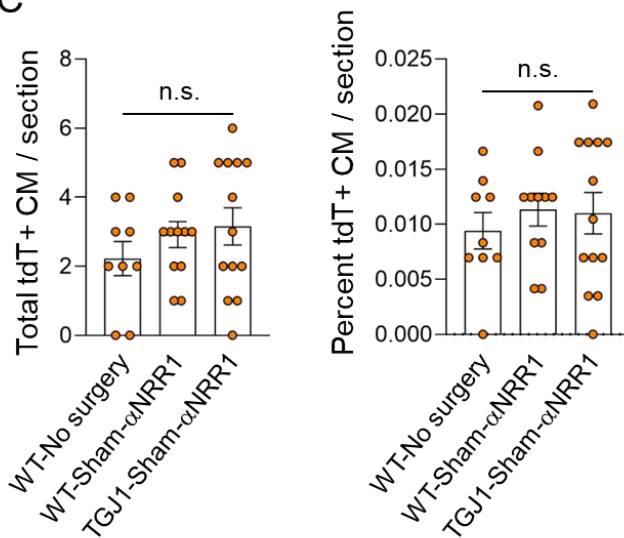

D

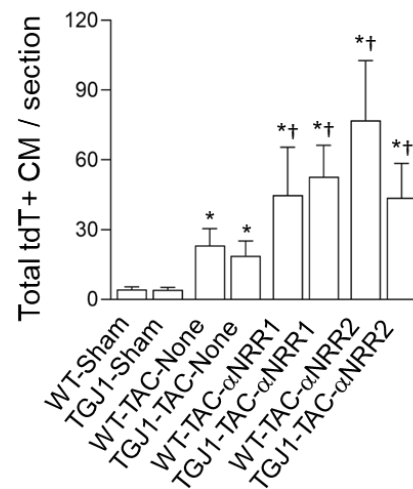

Supplementary Figure S4. Conversion from tdT- to EGFP-expressing cardiomyocytes in MerCreMer ; ROSA26-mTmG double transgenic mice upon tamoxifen administration. (A). *Myh6-MerCreMer; Rosa26-mTmG* mice received 5 daily injections of Tamoxifen to induced recombination of the ROSA26-mTmG locus. (B). The hearts were harvested two days after the last Tamoxifen injection and processed for immunostaining to reveal  $\alpha$ -actinin-positive (Gray) converted EGFP-positive CMs (Green) and tdT-positive non-converted NMCs (Red). Note the nearly complete conversion of CMs from tdT to EGFP expression, and the lack of EGFP expression in NMCs, which remained tdT-positive. Scale bar = 50  $\mu$ m. (C). Number and percentage of tdT+ cardiomyocytes per transverse heart tissue section in the untouched WT heart and in sham-operated WT and TGJ1 hearts following Tamoxifen-induced conversion as an indication of the amounts of CMs escaping conversion into GFP-expressing CMs. (D). Quantification of new tdT+ CMs in WT and TGJ1 mice subjected to Sham or TAC operation and treated with  $\alpha$ NRR1,  $\alpha$ NRR2 antibodies or none. The data show numbers of tdT+ CMs per heart section \*,  $p < 0.05$  in TAC vs. Sham; †,  $p < 0.05$  in  $\alpha$ NRR vs. None (n = 4-8 mice per group).



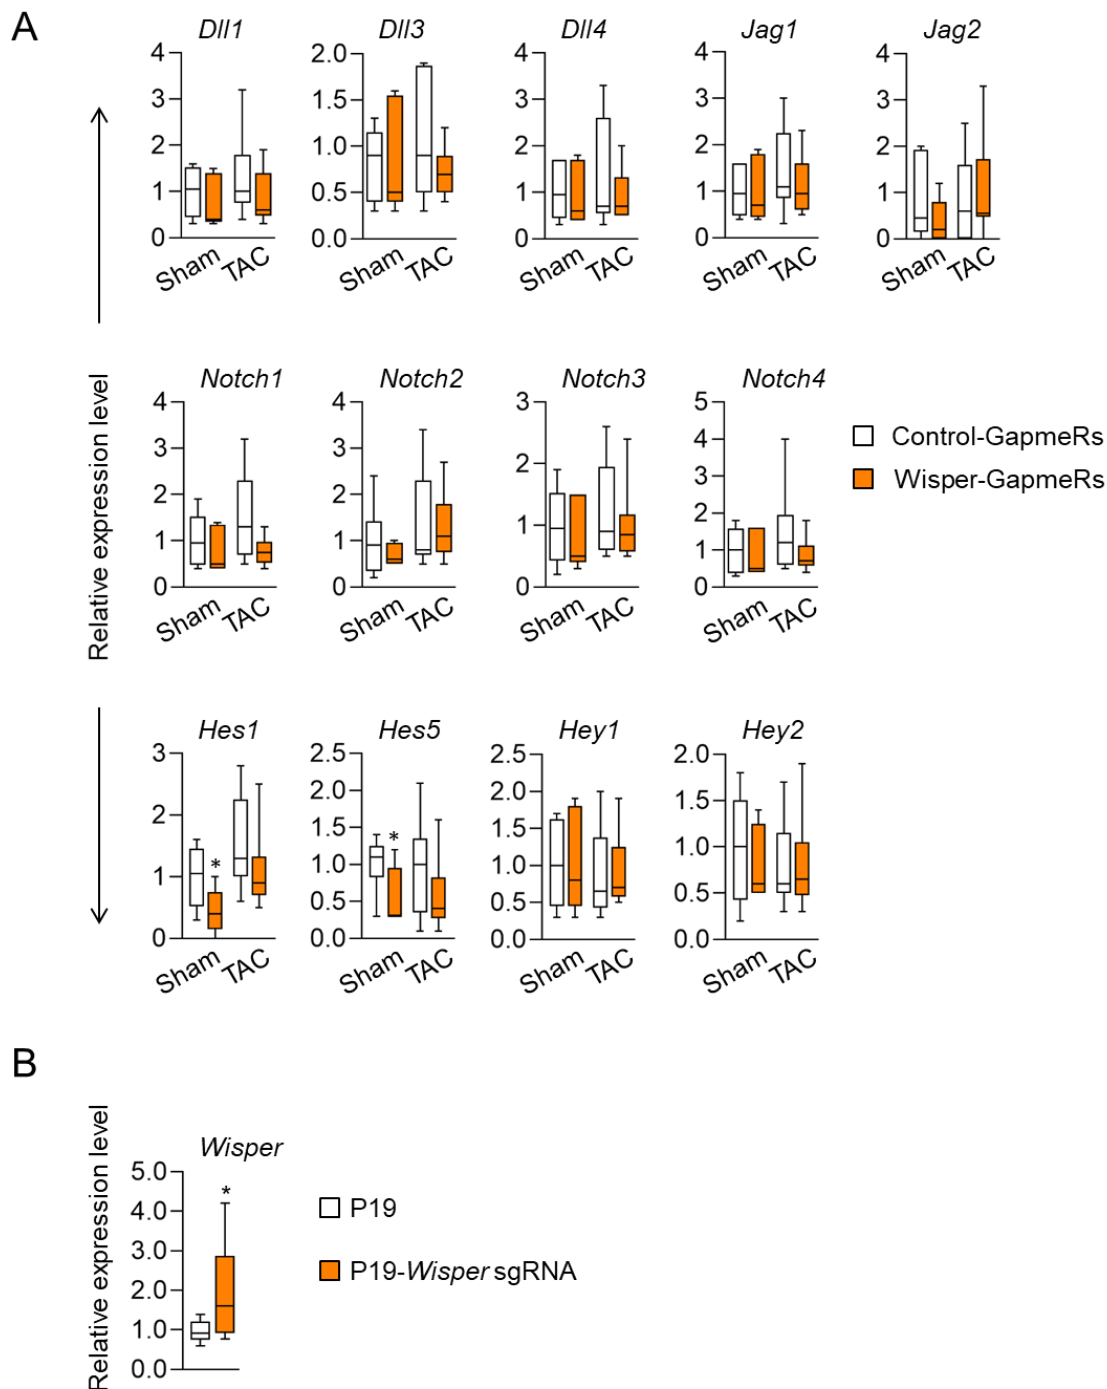

Supplementary Figure S5. Wisper knockdown is associated with downregulation of the NOTCH pathway in the heart. Mice were subjected to the experimental protocol as in Figure 5A. **(A)**. Quantitative RT-PCR analysis of the expression level of NOTCH ligands (*Dll1*, *Dll3*, *Dll4*, *Jag1* and *Jag2*), receptors (*Notch1*-*Notch4*) and target genes (*Hes1*, *Hes5*, *Hey1* and *Hey2*). \*,  $p < 0.05$  in Wisper-Gapmer vs. Control-Gapmer. **(B)**. Activation of Wisper expression in P19Cl6 cell line. P19Cl6 embryonal carcinoma cells were transfected a plasmid encoding dCas9-vp16-MS2-p65-Hsf1 and a plasmid expressing a guide RNA targeting Wisper promoter region to induce Wisper expression. The expression of Wisper was evaluated by quantitative RT-PCR analysis. Mean  $\pm$  SEM \*,  $p < 0.05$  in P19-Wisper sgRNA vs. P19, ( $n = 3$ ).
